# Supplementary material
Source: ML conference proceedings conference paper supplement (https://openreview.net/forum?id=Li2rpRZWjy)
Supplement: supplementary_material [file attachment]

## Sheet: Form responses 1
Timestamp	b a a	a b a a	b b a	b a a b	a a b	) ( [ ]	) ( ( ) [ ]	) ( [ ( ) ]	) ( ( )	) ( [ [ ] ]	a b a	a b b a	a b a a b a	a b a b	a a b a
2024-05-16 09:51:25	b	ba	a	aab	baa	)(	][	)(	)(	)(	ba	bba	abaaba	abab	baa
2024-05-16 09:59:54	a	a	b	a	a	)	)	)	)	)	b	b	a	a	a
2024-05-16 10:18:16	a a b	a a b a	a b b	b a a b	b a a	) (	[ ] ) (	) (	[ ] ) (	( ) ( ) ) (	a a	a a	a a a a	a a	a a a
2024-05-16 10:30:01	baabaa	baabaa	abbaabb	aabaab	baabb	([	[])(	)([()]	())(	)([[]]	baba	abbaabba	abaab	abab	abaa
2024-05-16 13:44:49	b	bbab	a		b	)(	)(	)(	)(	)(	b	YOU ARE THE DANCING QUEEN YOUNG AND SWEET ONLY SEVENTEEN	b		b
2024-05-16 18:05:10	baa	ba	a	aa	b	)(	()))(	)(	((	)(	b	aa	a	ab	baa
2024-05-16 18:31:26	baaa	aabaaa	bbba	baaab	aabb	)([])(	)(()[])(	)([()])(	)(())(	)([[]]])(	b	a	bab	ba	ba
2024-05-17 09:37:02	b	ab	a	bb	b	()	()	() ()	() ()	()	b	baa	bbaa	bb	b
2024-05-17 09:55:04	a b b	b a b b	a a b	a b b a	b b a	) (	) (	) (	) (	) (	a	a a	a	a	a
2024-05-17 11:50:37	b	b b	a	already completed	b	) (	) (	already completed	) (	( )	b	a b	b	already completed	b
